# Supplementary material
Source: PubMed Central journal article supplement (PMC11386178)
Supplement: PBI-19-1141-s001.pdf [file PBI-19-1141-s001.pdf]

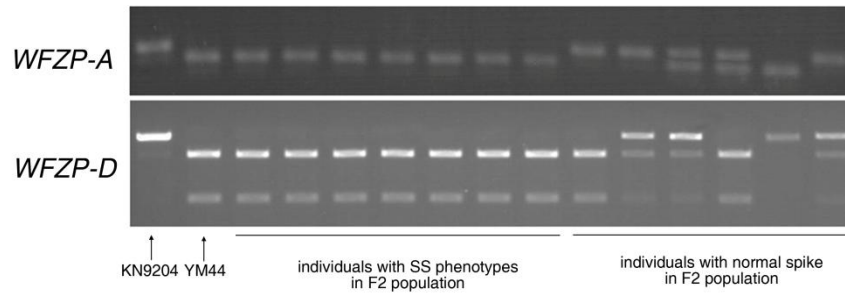

Fig. S1 Linkage analysis of *WFZP-A*, *WFZP-D* and YM44 SSs phenotype. This linkage analysis was conducted using another batch of individuals in the F<sub>2</sub> population differing from those used in Fig. 2A.

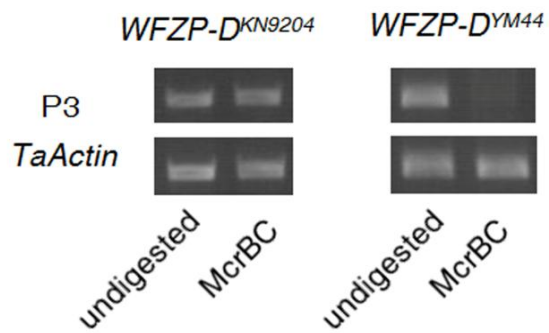

Fig. S2 McrBC analysis of the promoter of *WFZP-D* in the P3 region in the individuals of F<sub>2</sub> crossed by KN9204 and YM44. *WFZP*<sup>KN9204</sup> indicating individuals with the *WFZP-D* homozygous genotype deriving from KN9204, and *WFZP*<sup>YM44</sup> indicating individuals with the *WFZP-D* homozygous genotype deriving from YM44.

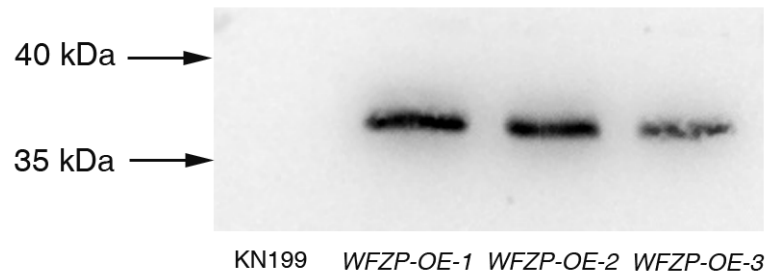

Fig. S3 Western blotting of *WFZP* OE lines expressing the protein of *WFZP* fused with 3 FLAGs.

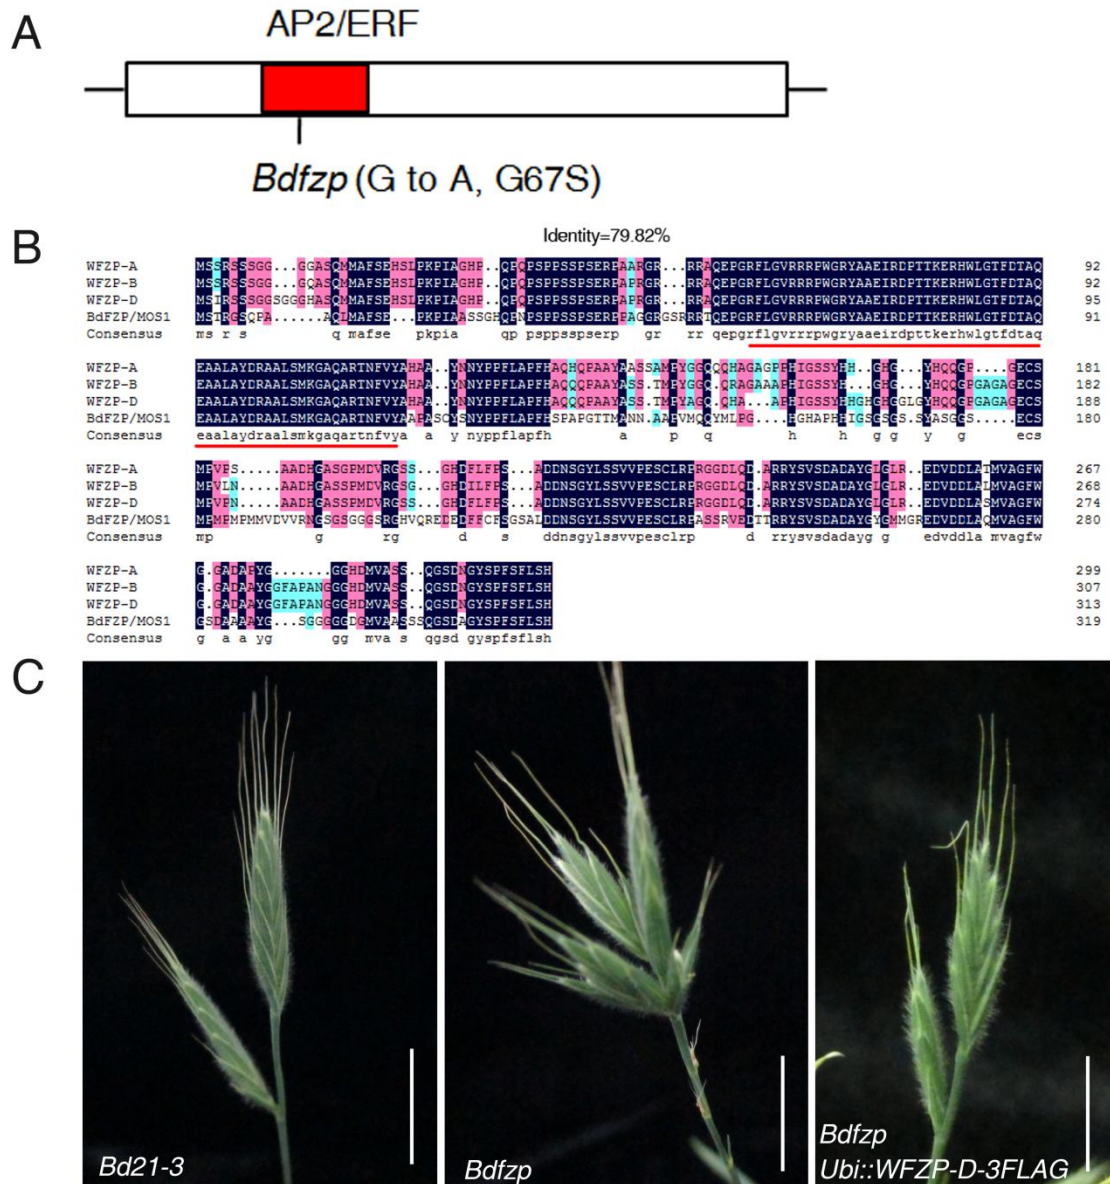

Fig. S4 Functional verification of *WFZP*. (A) The schematic diagram of the sequence of *BdFZP* in *Bdfzp* mutant. A G-to-A mutation occurred in AP2/ERF domain (red color). (B) The protein alignment of *WFZP*-A, B, D and *BdFZP*. (C) The spike of *Bd21-3*, *Bdfzp* and *Ubi::WFZP-D* in *Bdfzp*. Bars = 1cm in C.

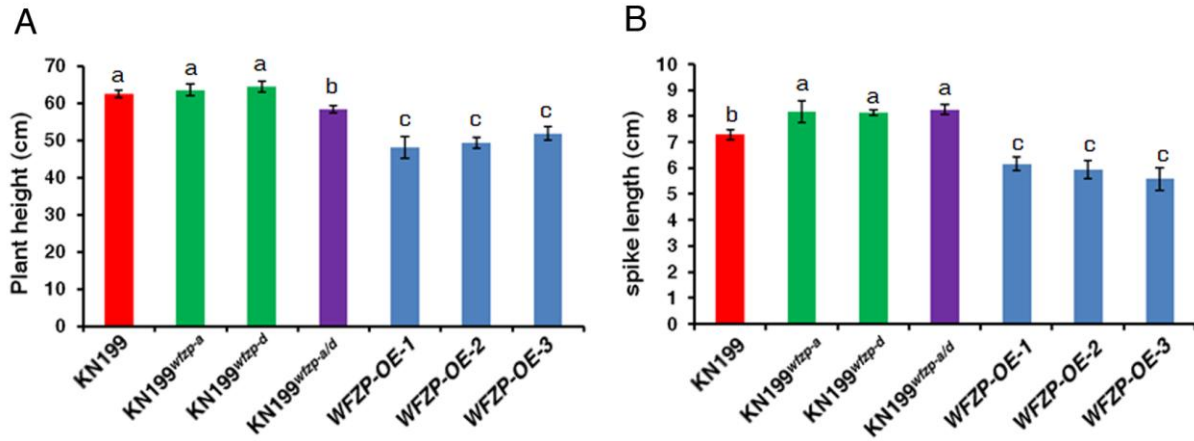

Fig. S5 Statistics comparison of plant height (A) and spike length (B) between KN199, KN199<sup>wfzp-a</sup>, KN199<sup>wfzp-d</sup>, KN199<sup>wfzp-a/d</sup> and WFZP OE lines. The error bars denote ± SE. Different letters mean significant difference at  $P < 0.01$ .

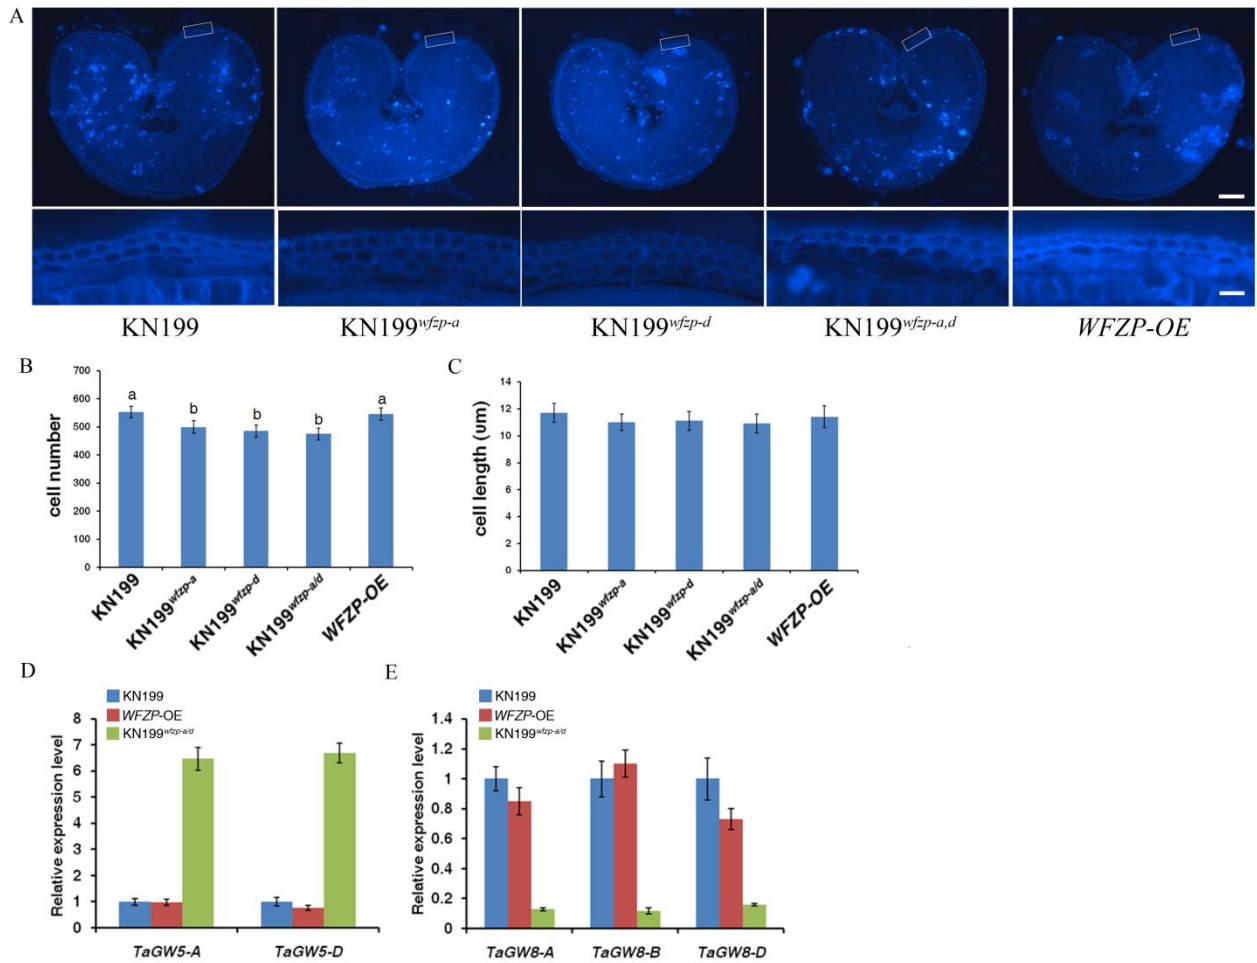

Fig. S6 Effects of *WFZP* on seed coat cell proliferation. (A) Cross sections at the middle of seeds of KN199, KN199<sup>wfzp-a</sup>, KN199<sup>wfzp-d</sup>, KN199<sup>wfzp-a/d</sup> and *WFZP* OE lines stained with Fluorescent Brightener 28. Figures in the bottom part were magnified figures in the pane in the upper part. (B) and (C) Statistics comparison of cell number (B) and cell length (C) in the cross section of the outer seed integuments of KN199, KN199<sup>wfzp-a</sup>, KN199<sup>wfzp-d</sup>, KN199<sup>wfzp-a/d</sup> and *WFZP* OE lines. The error bars denote ± SE. Different letters mean significant difference at  $P < 0.01$ . (D) and (E) The expression level of *TaGW5* (D) and *TaGW8* (E) in KN199, *WFZP* OE, and KN199<sup>wfzp-a/d</sup> detected by qPCR. The error bars denote ± SE.

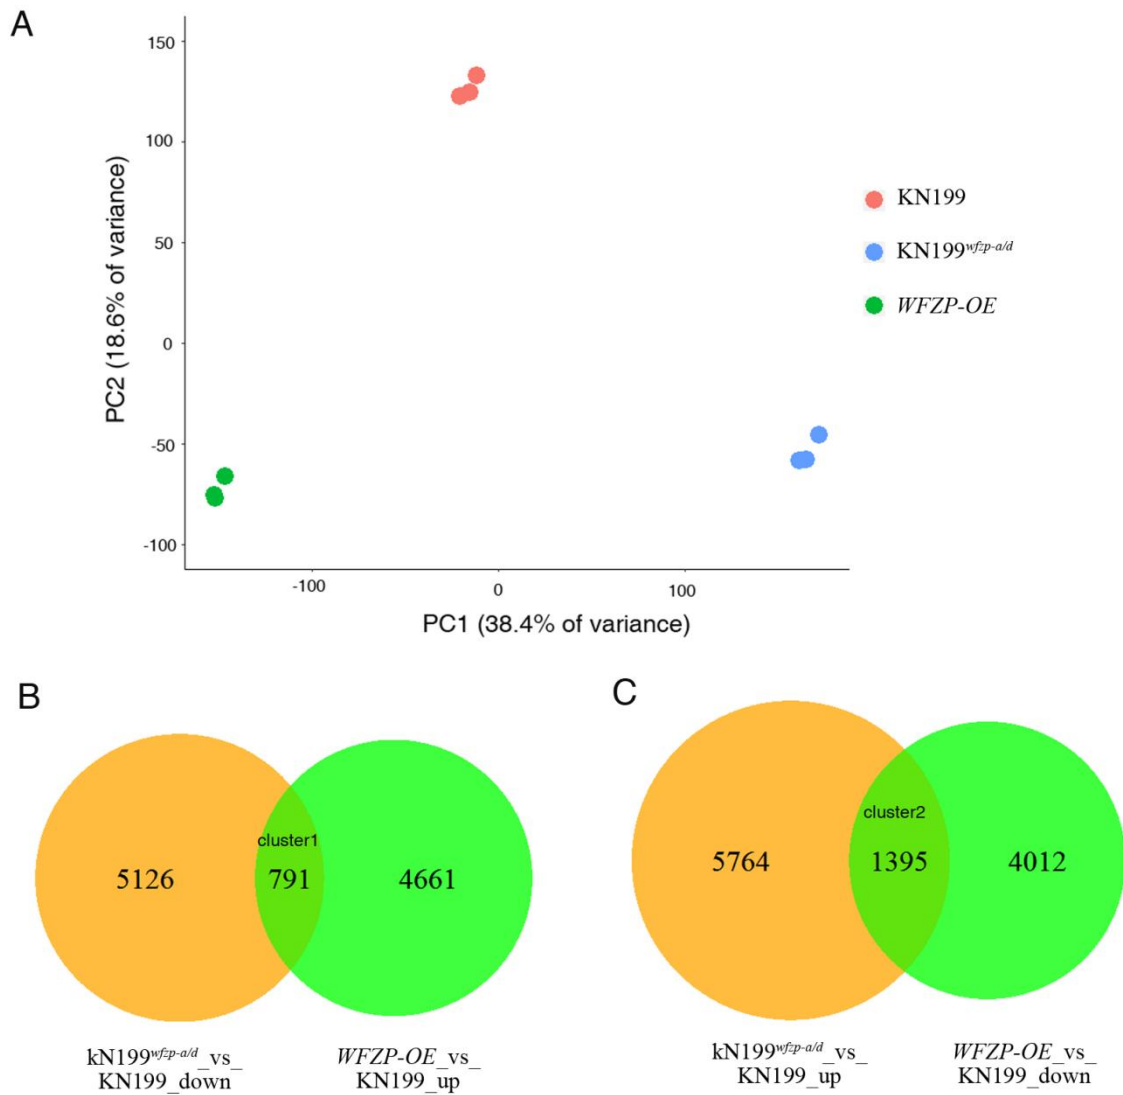

Fig. S7 The overall view of RNA-seq data. (A) The PCA result of RNA-seq data of different samples. (B) The overlapped DEGs between KN199<sup>wfp-a/d</sup>\_vs\_KN199 down-regulated genes and WFZP-OE\_vs\_KN199 up-regulated genes. (C) The overlapped DEGs between KN199<sup>wfp-a/d</sup>\_vs\_KN199 up-regulated genes and WFZP-OE\_vs\_KN199 down-regulated genes.

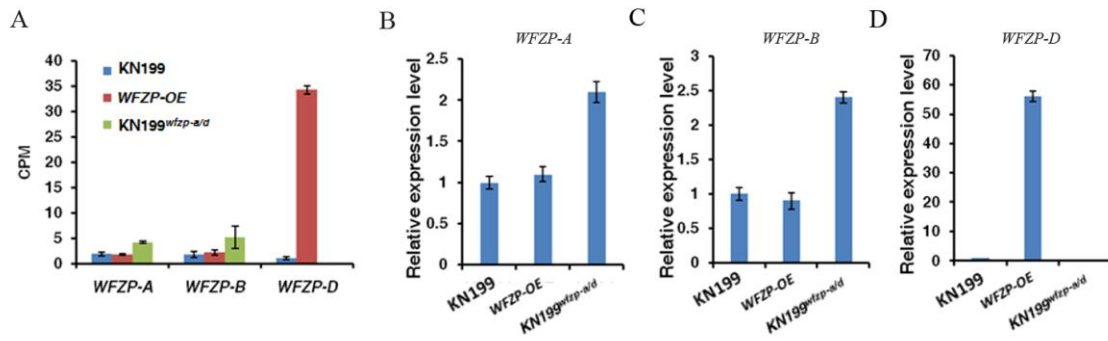

Fig. S8 The expression level of *WFZP-A*, *B* and *D* in KN199, *KN199<sup>wfzp-a/d</sup>* and *WFZP OE* lines detected by RNA-seq (A) and qPCR (B to D). The error bars denote  $\pm$  SE.



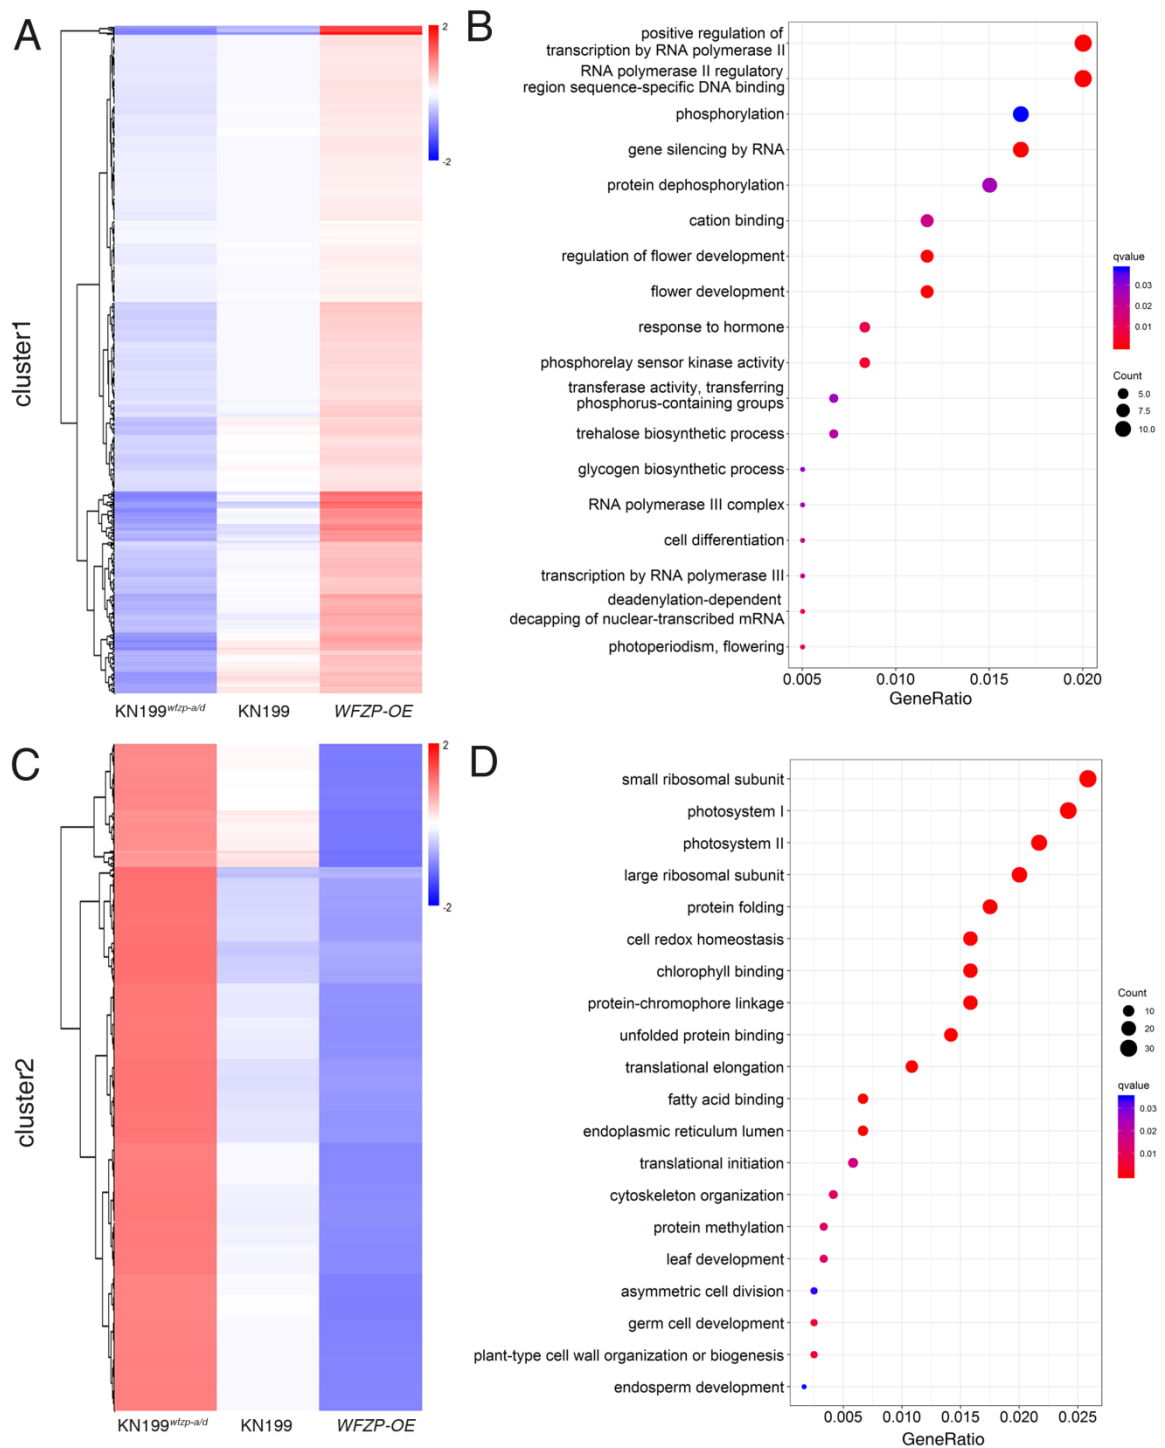

Fig. S9 GO enrichment analysis of genes in the overlapped DEGs of *KN199<sup>wfp-a/d</sup>* up-regulated/down-regulated genes and *WFZP-OE* down-regulated/up-regulated genes. (A) Heatmap of genes down-regulated in *KN199<sup>wfp-a/d</sup>* and up-regulated in *WFZP-OE* line. (B) GO enrichment analysis of genes down-regulated in *KN199<sup>wfp-a/d</sup>* and up-regulated in *WFZP-OE* line. (C) Heatmap of genes up-regulated in *KN199<sup>wfp-a/d</sup>* and down-regulated in

*WFZP-OE* line. (D) GO enrichment analysis of genes up-regulated in *KN199<sup>wfzp-a/d</sup>* and down-regulated in *WFZP-OE* line.

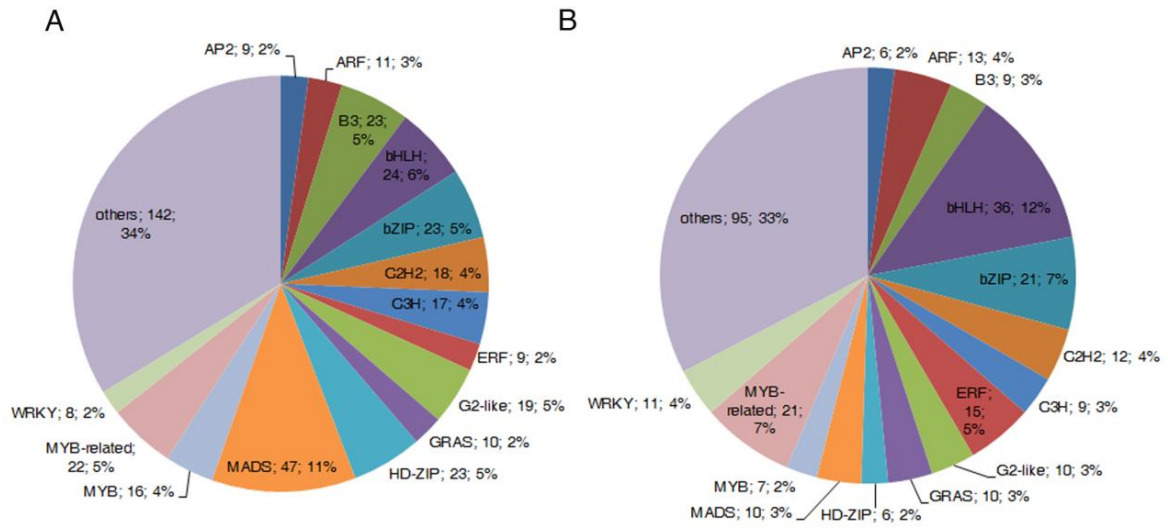

Fig. S10 Transcription factors in the KN199<sup>wfzp-a/d</sup>\_vs\_KN199 down-regulated genes (A) and KN199<sup>wfzp-a/d</sup>\_vs\_KN199 up-regulated genes (B).

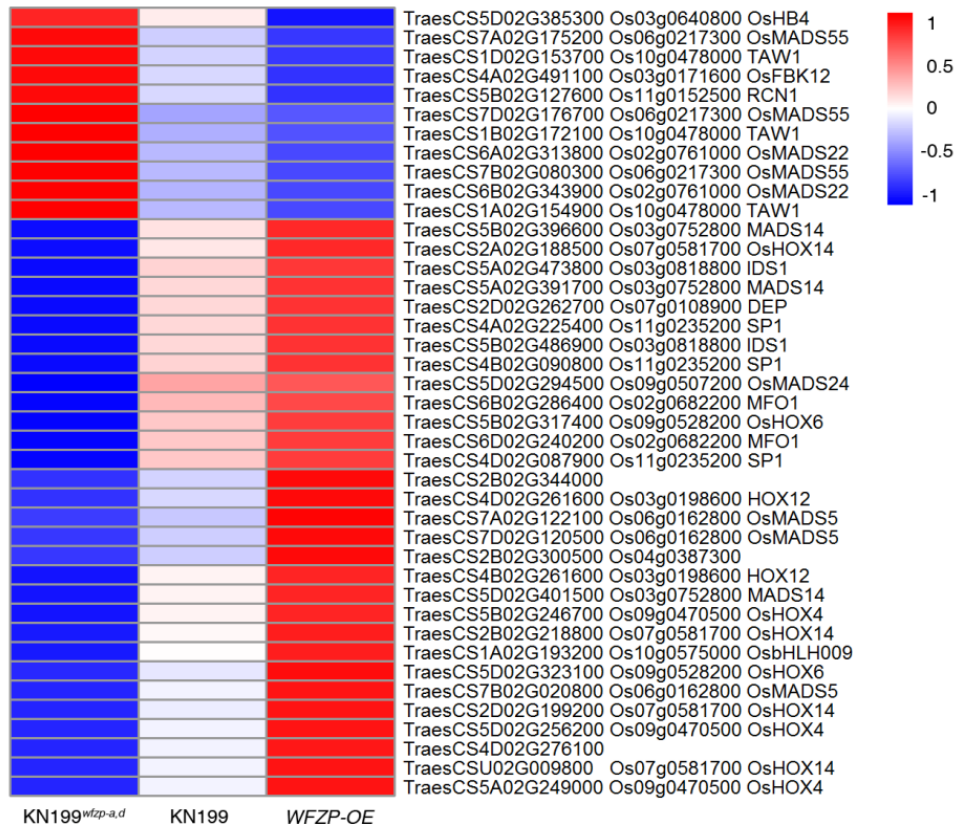

Fig. S11 Heatmap of MADS family TFs, HD-ZIP family TFs and other development related genes in the overlapped DEGs of KN199<sup>wfp-a/d</sup> up-regulated/down-regulated genes and WFZP-OE down-regulated/up-regulated genes.

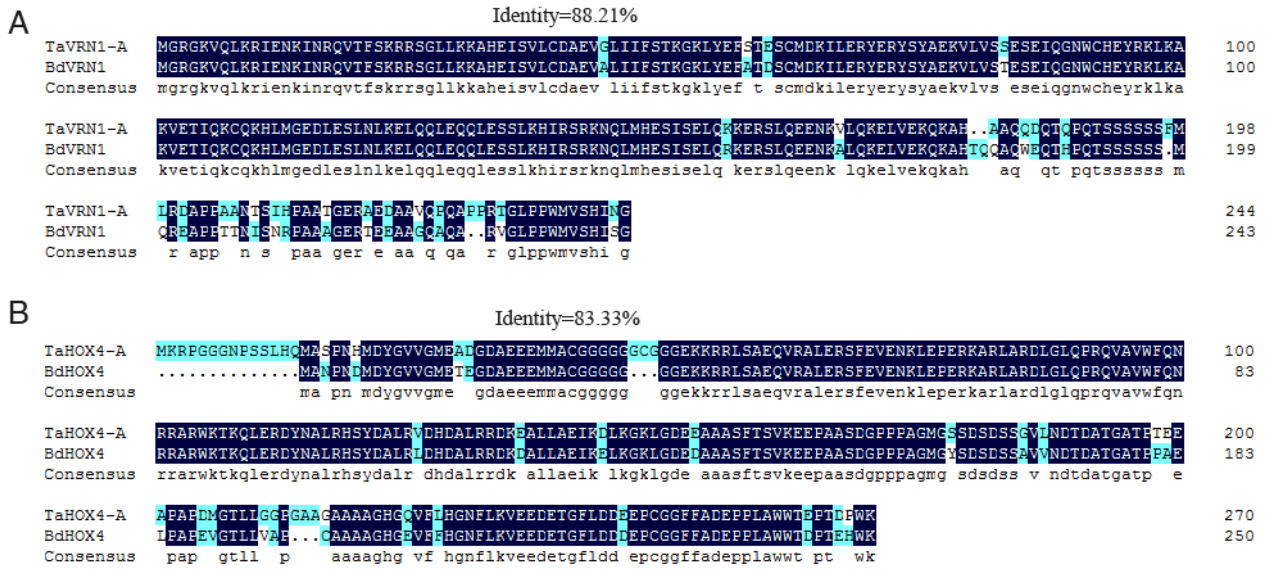

Fig. S12 The protein alignment of TaVRN1-A and BdVRN1 (A) and TaHOX4-A and BdHOX4 (B).

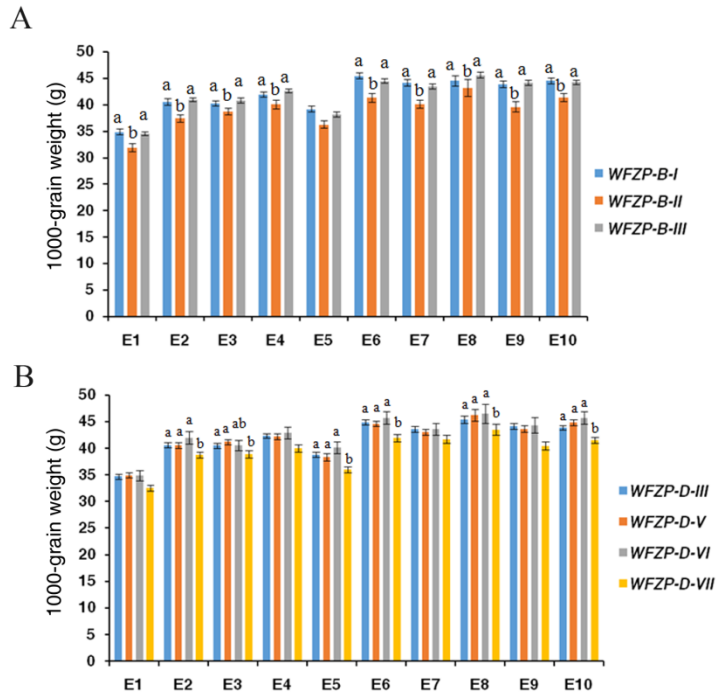

Fig. S13 1000-grain weight of cultivars with different haplotypes of *WFZP-B* (A) and *WFZP-D* (B) in ten growing environments. The error bars denote  $\pm$  SE. Different letters mean significant difference at  $P < 0.05$ . Note that the number of cultivars with *WFZP-D-I*, *II* and *IV* were too few (2, 3 and 2 for each, Supplemental dataset S7), so only the other four haplotypes were analyzed.

Table S1. The polymorphism of *WFZP-B*

| No. | Site          | Variation type | <i>WFZP-B-I</i> | <i>WFZP-B-II</i> | <i>WFZP-B-III</i> |
|-----|---------------|----------------|-----------------|------------------|-------------------|
| 1   | -1987 - -1933 | Indel          | Del             | Del              | In                |
| 2   | -1839         | SNP            | T               | T                | C                 |
| 3   | -1809- -1808  | SNP            | CT              | CT               | TC                |
| 4   | -1747         | SNP            | T               | T                | C                 |
| 5   | -1726         | SNP            | C               | C                | T                 |
| 6   | -1419         | SNP            | T               | T                | C                 |
| 7   | -1208         | SNP            | T               | T                | C                 |
| 8   | -1187         | SNP            | A               | A                | G                 |
| 9   | -867          | SNP            | C               | C                | G                 |
| 10  | -785          | SNP            | A               | A                | G                 |
| 11  | -752- -750    | Indel          | Del             | Del              | In                |
| 12  | -559          | SNP            | G               | G                | A                 |
| 13  | -545          | SNP            | T               | T                | C                 |
| 14  | -484          | SNP            | G               | A                | G                 |
| 15  | -482          | SNP            | A               | A                | G                 |
| 16  | -469          | SNP            | C               | C                | A                 |
| 17  | -424- -412    | Indel          | Del             | Del              | In                |
| 18  | -392          | SNP            | T               | T                | C                 |
| 19  | -374          | SNP            | C               | C                | T                 |
| 20  | -362          | SNP            | A               | A                | G                 |
| 21  | -330- -315    | Indel          | Del             | Del              | In                |
| 22  | -311          | SNP            | T               | T                | C                 |
| 23  | -308          | SNP            | A               | A                | G                 |
| 24  | -269          | SNP            | G               | G                | A                 |
| 25  | -137          | SNP            | T               | T                | A                 |
| 26  | 144           | SNP            | T               | T                | C                 |
| 27  | 491           | SNP            | G               | G                | A                 |
| 28  | 619           | SNP            | T               | T                | A                 |

Variations labeled with the same color were linked.

Variations highlighted were selected to develop molecular markers.

Table S2. The polymorphism of *WFZP-D*

| No. | Site  | Variation type | <i>WFZP-D-I</i> | <i>WFZP-D-II</i> | <i>WFZP-D-III</i> | <i>WFZP-D-IV</i> | <i>WFZP-D-V</i> | <i>WFZP-D-VI</i> | <i>WFZP-D-VII</i> |
|-----|-------|----------------|-----------------|------------------|-------------------|------------------|-----------------|------------------|-------------------|
| 1   | -1974 | SNP            | G               | G                | G                 | C                | C               | C                | G                 |
| 2   | -1425 | SNP            | G               | G                | G                 | A                | A               | A                | G                 |
| 3   | -1410 | Indel          | In              | Del              | In                | Del              | In              | Del              | Del               |
| 4   | -1344 | SNP            | T               | T                | T                 | C                | C               | C                | T                 |
| 5   | -1261 | SNP            | T               | T                | T                 | G                | G               | G                | T                 |
| 6   | -1183 | SNP            | T               | T                | T                 | C                | C               | C                | T                 |
| 7   | -1166 | SNP            | C               | C                | C                 | T                | T               | T                | C                 |
| 8   | -1164 | SNP            | C               | T                | C                 | T                | C               | T                | T                 |
| 9   | -1063 | SNP            | T               | C                | C                 | T                | T               | C                | T                 |
| 10  | -908  | SNP            | T               | T                | T                 | A                | A               | A                | T                 |
| 11  | -843  | SNP            | C               | A                | C                 | A                | C               | A                | A                 |
| 12  | -742  | SNP            | T               | T                | T                 | A                | A               | A                | T                 |
| 13  | -528  | SNP            | A               | G                | A                 | G                | A               | G                | G                 |
| 14  | -378  | SNP            | T               | T                | T                 | A                | A               | A                | T                 |
| 15  | 552   | SNP            | C               | C                | C                 | G                | G               | G                | C                 |

Variations labeled with the same color were linked.

Variations highlighted were selected to develop molecular markers.



Table S3. Association analysis of *WFZP* with SNS and TGW

| environment | Years | location  | Water and temperature | P-value           |                   |               |                   |               |                   |
|-------------|-------|-----------|-----------------------|-------------------|-------------------|---------------|-------------------|---------------|-------------------|
|             |       |           |                       | <i>WFZP-A</i>     |                   | <i>WFZP-B</i> |                   | <i>WFZP-D</i> |                   |
|             |       |           |                       | SNS               | TGW               | SNS           | TGW               | SNS           | TGW               |
| E1          | 2015  | Shunyi    | DS+HS                 | <b>0.00496*</b>   | <b>0.0075*</b>    | 0.77482       | <b>0.03662*</b>   | 0.96727       | 0.05439           |
| E2          | 2015  | Shunyi    | DS                    | <b>0.01641*</b>   | <b>0.0001376*</b> | 0.74611       | <b>5.026E-06*</b> | 0.33573       | <b>0.02965*</b>   |
| E3          | 2015  | Shunyi    | WW+HS                 | <b>0.02615*</b>   | 0.22213           | 0.39132       | <b>0.03341*</b>   | 0.92688       | <b>0.03128*</b>   |
| E4          | 2015  | Shunyi    | WW                    | 0.08337           | <b>0.0006261*</b> | 0.93637       | <b>0.006*</b>     | 0.74899       | 0.06958           |
| E5          | 2016  | Shunyi    | DS+HS                 | <b>0.02464*</b>   | 0.53468           | 0.07453       | 0.07095           | 0.95462       | <b>0.02916*</b>   |
| E6          | 2016  | Shunyi    | DS                    | <b>0.00316*</b>   | <b>0.00358*</b>   | 0.14227       | <b>5.388E-05*</b> | 0.733         | <b>0.01924*</b>   |
| E7          | 2016  | Shunyi    | WW+HS                 | 0.18959           | 0.08703           | 0.18488       | <b>5.749E-05*</b> | 0.95009       | 0.66021           |
| E8          | 2016  | Shunyi    | WW                    | <b>0.02339*</b>   | <b>6.935E-05*</b> | 0.14266       | <b>0.00689*</b>   | 0.61586       | <b>0.0176*</b>    |
| E9          | 2016  | Changping | WW                    | <b>0.00663*</b>   | 0.07545           | 0.05396       | <b>0.0001063*</b> | 0.93546       | 0.0554            |
| E10         | 2016  | Changping | DS                    | <b>5.201E-05*</b> | <b>0.00313*</b>   | 0.31636       | <b>0.0002177*</b> | 0.19367       | <b>0.0003555*</b> |

SNS, spikelet number per spike; TGW, thousand grain weight; DS, drought stress; HS, heat stress; WW, well-watered.

Table S4. Primers used in this study

| Primer name                     | Sequence                                  | Aim and introduction                                           | Reference |
|---------------------------------|-------------------------------------------|----------------------------------------------------------------|-----------|
| <b>Primers for construction</b> |                                           |                                                                |           |
| WFZP-2DOE-F                     | CGACTCTAGAGGATCCTCAGTTCTGCCATGAGCATC      | Clone <i>WFZP-D</i> into pTCK303-3FLAG vector                  |           |
| WFZP-2DOE-R                     | GCTTGGCGCGACTAGTGTTGTTTCTGTGGGAGAGGAAG    |                                                                |           |
| VRN1-OE-F                       | CGACTCTAGAGGATCCATGGGGCGGGGAAGGT          | Clone <i>VRN1-A</i> into pTCK303-3FLAG vector                  |           |
| VRN1-OE-R                       | GCTTGGCGCGACTAGTCCCGTTGATGTGGCTCACC       |                                                                |           |
| TaHOX4-OE-F                     | CGACTCTAGAGGATCCATGAAGCGGCCCGGCGG         | Clone <i>TaHOX4-A</i> into pTCK303-3FLAG vector                |           |
| TaHOX4-OE-R                     | GCTTGGCGCGACTAGTCTTCCAGGGATCCGTCGG        |                                                                |           |
| WFZP-pMN6-F                     | TTGACTGTATCGCCCGGATGAGCATCCGCAGCAGCA      | Clone <i>WFZP-D</i> into pMN6 vector                           |           |
| WFZP-pMN6-R                     | GGAAATTCGAGCTCGGTACCTCAGTGGGAGAGGAAGCTGAA |                                                                |           |
| WFZP-A-P-F3                     | GACCCATAAAGCCATAGATTAGG                   | Clone <i>WFZP-A</i> promoter into ENTR1A-T vector              |           |
| WFZP-A-P-R                      | GGCAGAAGTGAAGTGAGGTTGG                    |                                                                |           |
| LUC-F1-KpnI                     | CGGGGTACCCCGATGGAAGACGCCAAAAACATA         | Clone <i>LUC</i> into the downstream of <i>WFZP-A</i> promoter |           |
| LUC-R1-NotI                     | ATTTGCGGCCGCTTTATTACAATTTGGACTTTCCGCC     |                                                                |           |
| RLUC-F-SalI                     | ACGCGTCGACGTGATGACTTCGAAAGTTTATGATCC      | Clone <i>R-LUC</i> into ENTR1A-T vector                        |           |
| RLUC-R-EcoRI                    | CGGAATTCCGTTATTGTTCAATTTTTGAGAACTCG       |                                                                |           |

| Primers for genotyping |                          |                                                                                                                                                                     |                                                                           |
|------------------------|--------------------------|---------------------------------------------------------------------------------------------------------------------------------------------------------------------|---------------------------------------------------------------------------|
| Xwmc522-F              | AAAAATCTCACGAGTCGGGC     | SSR marker for linkage analysis                                                                                                                                     | <a href="https://wheat.pw.usda.gov/GG3">https://wheat.pw.usda.gov/GG3</a> |
| Xwmc522-R              | CCCGAGCAGGAGCTACAAAT     |                                                                                                                                                                     |                                                                           |
| Cfd56-F                | TTGCATAATTACTTGCCCTCC    |                                                                                                                                                                     |                                                                           |
| Cfd56-R                | CTGGTCCAACCTCCATCCAT     |                                                                                                                                                                     |                                                                           |
| WFZP-D-P-F3            | GACCCCATAAAGCCATGGATTAGG | Linkage analysis of <i>WFZP-D</i> and SSs. PCR product was digested using <i>EcoNI</i> .                                                                            |                                                                           |
| WFZP-D-P-R2            | CGTCTGAGATAACGCTTTTAGCTG |                                                                                                                                                                     |                                                                           |
| WFZP_F3                | GCTCACAGTCTCAGCAACCA     | Linkage analysis of <i>WFZP-D</i> and SSs. WFZP_F3 + WFZP_2A_R3 used for first round PCR.                                                                           | (Dobrovolskaya et al., 2015)                                              |
| WFZP_2A_R3             | CACTGGGCACCGGCATGGAA     |                                                                                                                                                                     |                                                                           |
| WFZP-A-indel-F2        | AGCCGCAGCCGTCCCCG        |                                                                                                                                                                     |                                                                           |
| WFZP-A-indel-R2        | AAGCGCCCGGGCTCCTG        |                                                                                                                                                                     |                                                                           |
| Me-4F                  | GCAGGCATCTTTACACCATCTTA  | dCAPs primer of <i>WFZP-A</i> at -387 loci, Me-4F+2A-R2 used for first round PCR, 387F+387R used for second round PCR, using <i>HinfI</i> to digest the PCR product |                                                                           |
| WFZP-2A-R2             | TGGCAGAAGTGAAGTGAGGT     |                                                                                                                                                                     | (Dobrovolskaya et al., 2015)                                              |
| WFZP-A-387F            | GCAAGGATTGTGGCATGCA      |                                                                                                                                                                     |                                                                           |
| WFZP-A-387R            | CAAAGAGATGAGGAGAATGTTGAG |                                                                                                                                                                     |                                                                           |
| WFZP-B-P-F1            | GCGGATTAACCTTTGACCTCTG   | Indel marker for <i>WFZP-B</i> at -1987 - -1933 loci, F1+Indel-R used for first round PCR, F5+Indel-R used for second round PCR                                     |                                                                           |
| WFZP-B-P-F5            | GAGCATCTTCAACAGGCGTCA    |                                                                                                                                                                     |                                                                           |
| WFZP-B-Indel-R         | GGGAGCGACGAAGAGGTTT      |                                                                                                                                                                     |                                                                           |

|                                     |                             |                                                                                                                                                                     |                              |
|-------------------------------------|-----------------------------|---------------------------------------------------------------------------------------------------------------------------------------------------------------------|------------------------------|
| WFZP-B-484F                         | CATTCCCTCCTTTTACTCCT        | dCAPs primer of <i>WFZP-B</i> at -484 loci, 484F+P-R used for first round PCR, 484F+484R used for second round PCR, using <i>ScaI</i> to digest the PCR product     |                              |
| WFZP-B-484R                         | TATGGTCTTATAGGGACTTATAAGTAC |                                                                                                                                                                     |                              |
| WFZP-AB-P-R                         | GGCAGCGAATGCTCCGAGAAG       |                                                                                                                                                                     |                              |
| WFZP-D-P-F3                         | GACCCCATAAAGCCATGGATTAGG    | dCAPs primer of <i>WFZP-D</i> at -1974 loci, P-F3+Me1R used for first round PCR, 1974F+1974R used for second round PCR, using <i>Sall</i> to digest the PCR product |                              |
| Me1R                                | GTATCATCAGCGGTCAAAGTTAACG   |                                                                                                                                                                     |                              |
| WFZP-D-1974F                        | TGATCCTTGTCCAAGCATTTGTCGA   |                                                                                                                                                                     |                              |
| WFZP-D-1974R                        | CTCTCACATGAGGGGAGGGC        |                                                                                                                                                                     |                              |
| Me-3F                               | GCCTGCAAATTCTGGGTG          | dCAPs primer of <i>WFZP-D</i> at -1063 loci, Me3F+Me3R used for first round PCR, 1063F+1063R used for second round PCR, using <i>ApaI</i> to digest the PCR product |                              |
| Me-3R                               | CTTCAATTATATGGCCCTACATGT    |                                                                                                                                                                     |                              |
| WFZP-D-1063F                        | TCTCCTATGTTTATTCTAGTGTGCA   |                                                                                                                                                                     |                              |
| WFZP-D-1063R                        | GATACATGCCAAAATGCTACAC      |                                                                                                                                                                     |                              |
| Me-3F                               | GCCTGCAAATTCTGGGTG          | dCAPs primer of <i>WFZP-D</i> at -843 loci, Me3F+Me3R used for first round PCR, 843F+843R used for second round PCR, using <i>HinfI</i> to digest the PCR product   |                              |
| Me-3R                               | CTTCAATTATATGGCCCTACATGT    |                                                                                                                                                                     |                              |
| WFZP-D-843F                         | GGCAAGCTCTCTTCTTTTCGATT     |                                                                                                                                                                     |                              |
| WFZP-D-843R                         | GCCTTGCATGCTTTGATGAT        |                                                                                                                                                                     |                              |
| <b>Primers for qPCR or ChIP-PCR</b> |                             |                                                                                                                                                                     |                              |
| WFZP_F3                             | GCTCACAGTCTCAGCAACCA        | qPCR of <i>WFZP-A</i>                                                                                                                                               | (Dobrovolskaya et al., 2015) |
| WFZP_2A_R2                          | TGGCAGAAGTGAAGTGAGGT        |                                                                                                                                                                     |                              |

|               |                         |                                                           |                              |                     |
|---------------|-------------------------|-----------------------------------------------------------|------------------------------|---------------------|
| WFZP_F5       | ACGACATGGTCGCCTCGT      | qPCR of <i>WFZP-B</i>                                     | (Dobrovolskaya et al., 2015) |                     |
| WFZP_2B_R3    | CGGTGCATTTGCTTCAGTGT    |                                                           |                              |                     |
| WFZP_F5       | ACGACATGGTCGCCTCGT      | qPCR of <i>WFZP-D</i>                                     | (Dobrovolskaya et al., 2015) |                     |
| WFZP_2D_R5    | CTGGCTGGTGCATTTGTTG     |                                                           |                              |                     |
| WFZP-D-OE-q-F | CACATTGGCAGCTCGTACCA    | qPCR of <i>WFZP-D</i> in <i>WFZP</i> overexpression lines |                              |                     |
| WFZP-D-OE-q-R | TGGGGAAGAGGAAGTCGTG     |                                                           |                              |                     |
| VRN1-q-F      | GATCAAACCTCAGCCTCAAACCA | qPCR of selected genes                                    |                              |                     |
| VRN1-q-F      | CCGCATCCTCTGCCCTCT      |                                                           |                              |                     |
| TaHOX4-q-F    | TGGCCAGCCCAATCATAT      |                                                           |                              |                     |
| TaHOX4-q-R    | GGCTCCAGCTTGTTCTCCA     |                                                           |                              |                     |
| BdVRN1-q-F    | GCTCTGCAGAAGGAACCTTGTTG |                                                           |                              |                     |
| BdVRN1-q-R    | CTAGTTTGCGGGTGTGTTTGCTC |                                                           |                              |                     |
| BdHOX4-q-F    | GAGATCAAGGAGCTGAAGGG    |                                                           |                              |                     |
| BdHOX4-q-R    | CTGGAGTCGCTGTCGGAATA    |                                                           |                              |                     |
| TaGW5-A-F     | CACGGTTCATGGCAGTGAG     |                                                           |                              |                     |
| TaGW5-A-R     | CACATGATTGATCACAACGATG  |                                                           |                              |                     |
| TaGW5-D-F     | GTGCAACCGGGTGGAGGA      |                                                           |                              |                     |
| TaGW5-D-R     | TCACCACCTCCTCTGCAAGG    |                                                           |                              |                     |
|               |                         |                                                           |                              | (Ream et al., 2014) |

|                                                           |                                              |                                               |                                 |  |
|-----------------------------------------------------------|----------------------------------------------|-----------------------------------------------|---------------------------------|--|
| TaGW8-7A-RTF                                              | GCAGGCAGCATTTTGGTGTA                         |                                               | (Ma et al., 2019)               |  |
| TaGW8-7A-RTR                                              | TGGGGATGTGTTCACTCTGC                         |                                               |                                 |  |
| TaGW8-7B-RTF                                              | CTGACTCCAGTGCTGGACTCA                        |                                               |                                 |  |
| TaGW8-7B-RTR                                              | GTTGCTCATTTTCCCCACA                          |                                               |                                 |  |
| TaGW8-7D-RTF                                              | ACAGGCAGCATTTTGGTCTC                         |                                               |                                 |  |
| TaGW8-7D-RTR                                              | TCTGGCCAACATCGATACCG                         |                                               |                                 |  |
| VRN1-ChIP-F1                                              | GGAAACCAAGTAATCACTAACTTG                     | ChIP-PCR of certain regions of selected genes |                                 |  |
| VRN1-ChIP-R1                                              | TGCGGTGTATCTCCAAGAATG                        |                                               |                                 |  |
| VRN1-ChIP-F2                                              | GACCTAGCCAGCCAGCATT                          |                                               |                                 |  |
| VRN1-ChIP-R2                                              | GAAGGGAAAGAGCGGAGTT                          |                                               |                                 |  |
| VRN1-ChIP-F3                                              | CCTCACCCAACCACCTGA                           |                                               |                                 |  |
| VRN1-ChIP-R3                                              | CAACCCTACGCCCTACC                            |                                               |                                 |  |
| TaHOX4-ChIP-F1                                            | CTATGGGAGATGTCCTAAACC                        |                                               |                                 |  |
| TaHOX4-ChIP-R1                                            | ACATTACACTCCAGCAAAGAA                        |                                               |                                 |  |
| TaHOX4-ChIP-F2                                            | CTCTTCTCGCAGTAATCGG                          |                                               |                                 |  |
| TaHOX4-ChIP-R2                                            | GGAGGGAGGAGGGGTTT                            |                                               |                                 |  |
| <b>Primers for amplifying templates of in situ probes</b> |                                              |                                               |                                 |  |
| WFZP- FSP6                                                | GATTTAGGTGACACTATAGAATACATGAGCATCCGCAGCAGCAG |                                               | To amplify templates of in situ |  |

|                                   |                                              |                                                                   |  |
|-----------------------------------|----------------------------------------------|-------------------------------------------------------------------|--|
| WFZP- RT7                         | TGTAATACGACTCACTATAGGGCGATCAGTGGGAGAGGAAGCTG | probes of selected genes                                          |  |
| VRN1-FSP6                         | GATTTAGGTGACACTATAGAATACATGGGGCGGGGGAAGGT    |                                                                   |  |
| VRN1-RT7                          | TGTAATACGACTCACTATAGGGCGACCCGTTGATGTGGCTCACC |                                                                   |  |
| TaHOX4-FSP6                       | GATTTAGGTGACACTATAGAATACATGAAGCGGCCCGGGCGG   |                                                                   |  |
| TaHOX4-RT7                        | TGTAATACGACTCACTATAGGGCGACTTCCAGGGATCCGTCGG  |                                                                   |  |
| <b>Primers for McrBC analysis</b> |                                              |                                                                   |  |
| Me-1F                             | GACCCCATAAAGCCATGGATTAGG                     | McrBC analysis of certain region in the promoter of <i>WFZP-D</i> |  |
| Me-1R                             | GTATCATCAGCGGTCAAAGTTAACG                    |                                                                   |  |
| Me-2F                             | AGTCTGAGTGGTCAAGACGCG                        |                                                                   |  |
| Me-2R                             | AAACACGGCACCCAATCC                           |                                                                   |  |
| Me-3F                             | GCCTGCAAATTCTGGGTG                           |                                                                   |  |
| Me-3R                             | CTTCAATTATATGGCCCTACATGT                     |                                                                   |  |
| Me-4F                             | GCAGGCATCTTTACACCATCTTA                      |                                                                   |  |
| Me-4R                             | GGATGAGATGGCGTGATAGG                         |                                                                   |  |
| Me-5F                             | GACTGGCACAACATTCTCCTCC                       |                                                                   |  |
| Me-5R                             | TGCTGCTGCGGATGCTCA                           |                                                                   |  |
| Primers for SAAB                  |                                              |                                                                   |  |

|                      |                                                                    |  |                      |
|----------------------|--------------------------------------------------------------------|--|----------------------|
| SAAB-oligonucleotide | GAGAGGATCCAGTCAGCATGNNNNNNNNNNNNNNNNNNNNNNCT<br>CAGCCTCGAGAATTCCAA |  | (Smith et al., 2002) |
| SAAB-F               | GGGCTGGCAAGCCACGTTTGGTG                                            |  |                      |
| SAAB-R               | CCGGGAGCTGCATGTGTGTCAGAGG                                          |  |                      |

## Reference

- Dobrovolskaya, O., Pont, C., Sibout, R., Martinek, P., Badaeva, E., Murat, F., Chosson, A., Watanabe, N., Prat, E., Gautier, N., Gautier, V., Poncet, C., Orlov, Y.L., Krasnikov, A.A., Berges, H., Salina, E., Laikova, L. and Salse, J. (2015) *FRIZZY PANICLE* Drives Supernumerary Spikelets in Bread Wheat. *Plant Physiology* **167**, 189-199.
- Ma, L., Hao, C., Liu, H., Hou, J., Li, T. and Zhang, X. (2019) Diversity and sub-functionalization of TaGW8 homoeologs hold potential for genetic yield improvement in wheat. *Crop Journal* **7**, 830-844.
- Ream, T.S., Woods, D.P., Schwartz, C.J., Sanabria, C.P., Mahoy, J.A., Walters, E.M., Kaeppler, H.F. and Amasino, R.M. (2014) Interaction of Photoperiod and Vernalization Determines Flowering Time of *Brachypodium distachyon*. *Plant Physiology* **164**, 694-709.
- Smith, H.M.S., Boschke, I. and Hake, S. (2002) Selective interaction of plant homeodomain proteins mediates high DNA-binding affinity. *P Natl Acad Sci USA* **99**, 9579-9584.
